# Supplementary material for: Phase I safety trial of intravenous ascorbic acid in patients with severe sepsis
Source: PubMed Central journal article supplement (PMC3937164; doi:10.1186/1479-5876-12-32), 2014-01-31
Supplement: 1479-5876-12-32-S3.pdf [file 1479-5876-12-32-S3.pdf]

**Supplementary Table 2. Components of the Sequential Organ Failure Assessment (SOFA) scoring system**

| <b>Organ Failure Score</b> | <b>Respiratory</b>                        | <b>Neurological</b> | <b>Cardiovascular</b>                                                    | <b>Hepatic</b>       | <b>Coagulation</b>                  | <b>Renal</b>          |
|----------------------------|-------------------------------------------|---------------------|--------------------------------------------------------------------------|----------------------|-------------------------------------|-----------------------|
|                            | PaO <sub>2</sub> /FiO <sub>2</sub> (mmHg) | Glasgow Coma Score  | Mean Arterial Pressure<br>If hypotensive then<br>vasopressor requirement | Bilirubin<br>(mg/dL) | Platelets<br>(x10 <sup>3</sup> /μl) | Creatinine<br>(mg/dL) |
| <b>1</b>                   | < 400                                     | 13 - 14             | MAP < 70 mmHg                                                            | 1.2 - 1.9            | < 150                               | 1.2 - 1.9             |
| <b>2</b>                   | < 300                                     | 10 - 12             | Dopamine ≤ 5 μg/kg/min                                                   | 2.0 - 5.9            | < 150                               | 2.0 - 3.4             |
| <b>3</b>                   | < 200<br>mechanically ventilated          | 6 - 9               | Norepi ≤ 0.1 μg/kg/min                                                   | 6.0 - 11.9           | < 50                                | 3.5 - 4.9             |
| <b>4</b>                   | < 100<br>mechanically ventilated          | < 6                 | Norepi > 0.1 μg/kg/min                                                   | > 12                 | < 20                                | > 5                   |

SOFA score equals the sum of six organ failure scores
