# Supplementary material for: Phase I safety trial of intravenous ascorbic acid in patients with severe sepsis
Source: J Transl Med. 2014 Jan 31;12:32. doi: 10.1186/1479-5876-12-32 (PMC3937164; doi:10.1186/1479-5876-12-32)
Supplement: Additional file 2: Table S1 — Secondary outcomes of septic patients treated or not treated with intravenous ascorbic acid. Includes days on vasopressor, ventilator free days, ICU length of stay, and 28-day mortality. [file 1479-5876-12-32-S2.pdf]

**Supplementary Table 1. Secondary outcomes of septic patients treated or not treated with intravenous ascorbic acid**

| <b>Treatment Group</b> | <b>Days on Vasopressor</b> | <b>Ventilator Free Days</b> | <b>ICU Length of Stay</b> | <b>28-Day Mortality</b> |
|------------------------|----------------------------|-----------------------------|---------------------------|-------------------------|
| Placebo                | 3.9 (1 – 10)               | 7.6 (0 – 23)                | 11.0 (2 – 25)             | 62.5%                   |
| Lo-AscA                | 2.1 (1 – 6)                | 8.4 (0 – 22)                | 8.1 (1 – 19)              | 38.1%                   |
| Hi-AscA                | 3.6 (2 – 8)                | 4.8 (0 – 19)                | 9.1 (2 – 25)              | 50.6%                   |

Data reported as mean (range)
